# Supplementary material for: Novel heteronuclear ruthenium–copper coordination compounds as efficient DNA-cleaving agents
Source: Royal Society of Chemistry journal article supplement (doi:10.1039/c000077a), 2010-01-01
Supplement: c000077a.pdf [file c000077a.pdf]

## Supporting Information

Accompanying the manuscript

### Novel heteronuclear ruthenium-copper coordination compounds as efficient DNA-cleaving agents

Stefanie van der Steen,<sup>a</sup> Paul de Hoog,<sup>a</sup> Karlijn van der Schilden,<sup>a</sup> Patrick Gamez,<sup>a</sup> Marguerite Pitié,<sup>b</sup> Robert Kiss,<sup>c</sup> and Jan Reedijk<sup>a</sup>

<sup>a</sup> *Leiden Institute of Chemistry, Gorlaeus Laboratories, Leiden University, P.O. Box 9502, 2300 RA Leiden, The Netherlands*

<sup>b</sup> *Laboratoire de Chimie de Coordination du CNRS, 205 route de Narbonne, 31077 Toulouse cedex 4, France*

<sup>c</sup> *Unibioscreen SA, 40 avenue Joseph Wybran, 1070 Bruxelles, Belgium*

#### List of contents:

S-1: Synthesis of the heteronuclear Ru/Cu complexes.

S-2: Experimental details of the cleavage experiments.

S-3: Time-course experiments of DNA cleavage.

S-4: Analyses and cleavage with 5'-<sup>32</sup>P-end-labeled DNA.

Figure S-1: Time-course experiments of DNA cleavage.

Figure S-2: Cleavage reactions mediated by 2 in the presence of various scavengers and performed in air.

Figure S-3: Nucleobase sequences of the ODN I and ODN II fragments.

Figure S-4: PAGE analysis of the cleavage of the ODN I fragment. (HEPES).

### S-1.

**In situ preparation of the metal coordination compounds:** The ruthenium complexes were synthesized by van der Schilden,<sup>1, 2</sup> and have been used as such in the present studies. The ruthenium complexes were reacted with one equivalent of copper per terpy ligand. Typically, 500  $\mu\text{L}$  of a ruthenium complex (2 mM) solution in MilliQ  $\text{H}_2\text{O}$  was added to a 500  $\mu\text{L}$  solution of  $\text{CuCl}_2$  (2 mM or 4 mM depending on the number of terpy units) in MilliQ  $\text{H}_2\text{O}$ . Further dilutions have been made with MilliQ  $\text{H}_2\text{O}$  to obtain the appropriate complex concentrations for the cleavage studies. These solutions were stored at  $-18\text{ }^\circ\text{C}$ . X-band powder EPR spectra were obtained on a Bruker-EMX*plus* electron-spin resonance spectrometer (Field calibrated with DPPH ( $g = 2.0036$ )). X-Band EPR (frozen solution): **1**, first species:  $g_{\perp} = 2.05$ ,  $g_{\parallel} = 2.30$ ,  $A_{\parallel} = 12.6\text{ mT}$ ; second species:  $g_{\perp} = 2.05$ ,  $g_{\parallel} = 2.25$ ,  $A_{\parallel} = 13.1\text{ mT}$ ; **2**,  $g = 2.09$  (signal broad); **3**,  $g = 2.12$  (signal broad); **4**,  $g_{\perp} = 2.07$ ,  $g_{\parallel} = 2.25$ ,  $A_{\parallel} = 14.7\text{ mT}$  (signal broad). The  $g$  value observed at 2.02 is attributed to one of the signals of the Ru(III) center.<sup>3</sup> The other Ru<sup>III</sup> signals are hidden underneath the Cu  $g_{\perp}$  signals. The  $g_{\perp} = 2.07$ ,  $g_{\parallel} = 2.37$ ,  $A_{\parallel} = 11.4\text{ mT}$  (first species), and  $g_{\perp} = 2.07$ ,  $g_{\parallel} = 2.26$ ,  $A_{\parallel} = 13.8\text{ mT}$  (second species) are assigned to copper moieties.

### S-2.

**Nuclease activity on supercoiled DNA:** 1 mM MilliQ  $\text{H}_2\text{O}$  solutions of the complexes investigated were diluted to respectively 4, 8, 20 and 40  $\mu\text{M}$  with MilliQ water. 5  $\mu\text{L}$  of the complex solution were added to 10  $\mu\text{L}$  of supercoiled  $\Phi\text{X174}$  DNA (Invitrogen, 7 nM, 40  $\mu\text{M}$  base pairs) in 6 mM NaCl, and 20 mM sodium phosphate buffer (pH 7.2). To initiate the cleavage, 5  $\mu\text{L}$  of a 20 mM mercaptopropionic acid (MPA) solution in water were added, and the resulting reaction mixture was incubated at  $37\text{ }^\circ\text{C}$  for 1 h. The reaction was quenched at  $4\text{ }^\circ\text{C}$  using an ice bath, followed by the addition of 4  $\mu\text{L}$  of loading buffer (glycerol with bromophenol blue), prior to its loading on a 0.8% agarose gel containing  $1\text{ }\mu\text{g mL}^{-1}$  of ethidium bromide. The gels were run at a constant voltage of 70 V for 90 min. in TBE buffer containing  $1\text{ }\mu\text{g mL}^{-1}$  of ethidium bromide. The gels were visualized under a UV trans-illuminator, and the bands were quantified using a BioRad Gel Doc 1000 apparatus interfaced with a computer.

### S-3.

**Time-course experiments of DNA cleavage:** 50  $\mu\text{L}$  of complex solution were added to 100  $\mu\text{L}$  of supercoiled  $\Phi\text{X174}$  DNA (Invitrogen, 7 nM, 40  $\mu\text{M}$  base pairs) in 6 mM NaCl, and 20 mM sodium phosphate buffer (pH 7.2), and the resulting reaction mixture was incubated for 20 h at 37

°C. To initiate the cleavage, 50  $\mu\text{L}$  of 20 mM mercaptopropionic acid were added, and a sample was taken out every 10 min. 4  $\mu\text{L}$  of loading buffer (glycerol with bromophenol blue) were added, and the sample was directly frozen in liquid nitrogen. When all samples were collected, they were loaded on a 0.8% agarose gel containing 1  $\mu\text{g mL}^{-1}$  of ethidium bromide.

#### S-4.

**Analyses with 5'- $^{32}\text{P}$ -end-labeled DNA:** The ODNs I and II fragments (Figure S3) were purchased from Invitrogen. The concentrations of single-stranded ODNs were determined by UV titration at 260 nm.<sup>4</sup> The ODNs were end-labeled with  $^{32}\text{P}$  using standard procedures with  $\text{T}_4$  polynucleotide kinase (New England BioLabs) and [ $\gamma$ - $^{32}\text{P}$ ]ATP for the 5'-end, before being purified on a MicroSpin G25 column (Pharmacia).<sup>5,6</sup>

#### **Comparison of the cleavage patterns of ODN I-ODN II induced by the copper complexes:**

The 5'-end labeled 36mer target ODN I (2  $\mu\text{M}$ ) was annealed to 1 equiv of its complementary strand ODN II in 1100  $\mu\text{L}$  of Tris-HCl (20 mM, pH 7.2) by heating to 90 °C for 5 min, followed by slow cooling to room temperature. To 10  $\mu\text{L}$  of this solution were added 5  $\mu\text{L}$  of **1** (40  $\mu\text{M}$ ), **2** (20  $\mu\text{M}$ ), **3** (20  $\mu\text{M}$ ) and **4** (20  $\mu\text{M}$ ) solutions and 5  $\mu\text{L}$  MPA (5  $\mu\text{L}$  of water were added to the controls). The samples were incubated at 37 °C for 1 h, followed by precipitation in 20  $\mu\text{L}$  of sodium acetate buffer (3 M, pH 5.2), containing 1  $\mu\text{g}$  of calf-thymus testes DNA and 180  $\mu\text{L}$  of cold ethanol. The pellets were rinsed with ethanol and lyophilized. In order to study the DNA-cleavage mechanism, additional treatments were performed on some samples: (i) heating at 90 °C in 50  $\mu\text{L}$  of HEPES-NaOH buffer (0.1 M, pH 8.0) during 30 min., followed by ethanol precipitation; (ii) heating at 90 °C in 50  $\mu\text{L}$  of piperidine (0.2 M in water) for 30 min., followed by lyophilization. The samples were analyzed by denaturing 20% polyacrylamide gel electrophoresis and subsequent phosphorimagery. The Maxam and Gilbert sequencing scale was used to analyze the DNA fragments.<sup>7</sup>

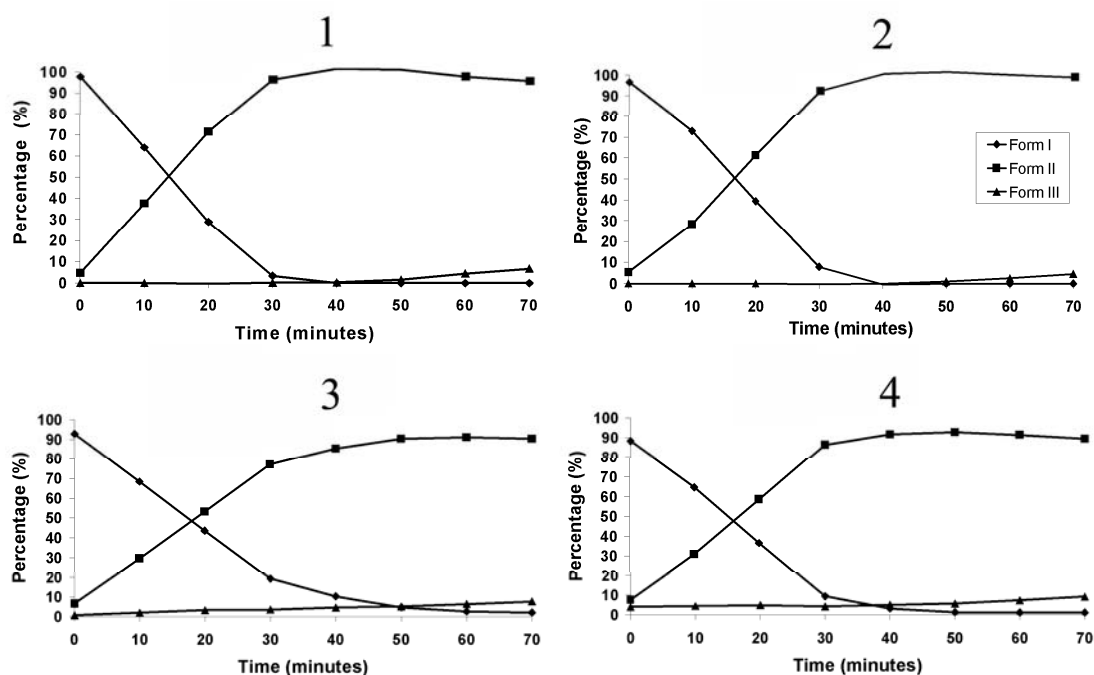

**Figure S-1.** Time-course experiments of DNA cleavage (20  $\mu$ M base pairs) over a period of 70 minutes in the presence of 5 mM MPA and air. The different plots have been obtained using, respectively, 5  $\mu$ M **1**, 2  $\mu$ M **2**, 2  $\mu$ M **3** and 1  $\mu$ M **4**.

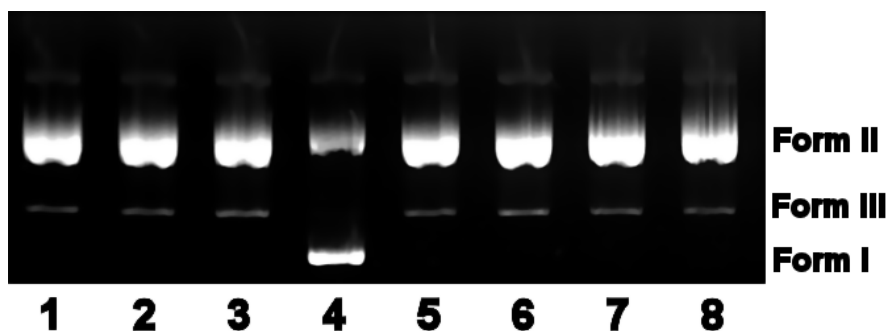

**Figure S-2.** Cleavage reactions mediated by **2** in the presence of various scavengers performed in air (except lane 4). All experiments were performed with a complex concentration of 5  $\mu$ M. Lane 1: no extra additives. Lane 2: 100  $\mu$ M  $\text{NaN}_3$ . Lane 3: 0.5 units superoxide dismutase. Lane 4: under argon. Lane 5: in the dark. Lane 6: under dioxygen. Lane 7: 20 mM DMSO. Lane 8: 20 mM ethanol. The other complexes showed the exact same cleavage activity.

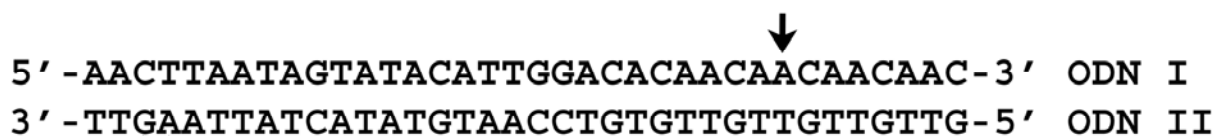

**Figure S-3.** Nucleobase sequences of the ODN I and ODN II fragments used for the PAGE cleavage experiments. The arrow shows the cleavage position in the ODN I fragment, which is not generated by the complexes, because it is present in the blank experiments as well.

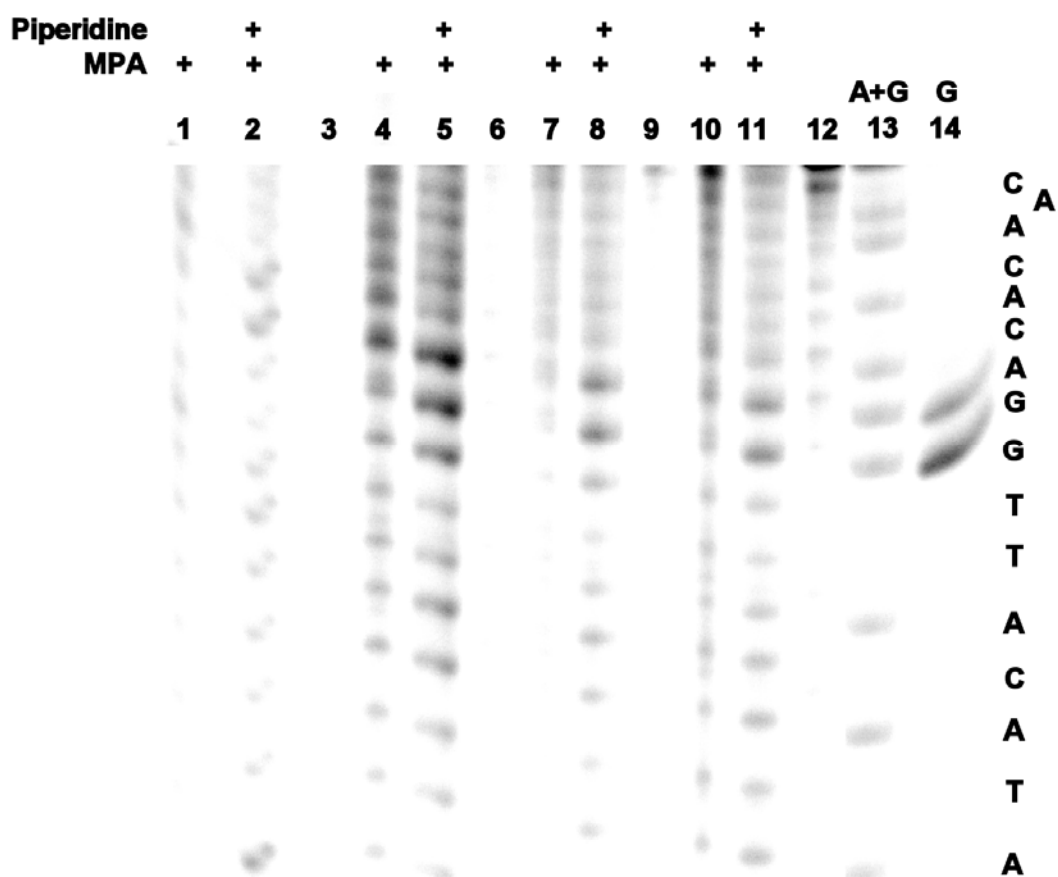

**Figure S-4.** PAGE analysis of the cleavage of the ODN I fragment of the ODN I-ODN II duplex (1  $\mu\text{M}$ ) mediated by **1** (10  $\mu\text{M}$ ), **2** (5  $\mu\text{M}$ ), **3** (5  $\mu\text{M}$ ), and **4** (5  $\mu\text{M}$ ). The cleavage reactions are initiated with MPA (5 mM) under aerobic conditions (lanes 1, 4, 7 and 10) or by heating during 30 min at 90 °C in 0.2 M aqueous piperidine (Lanes 2, 5, 8 and 11). The Maxam-Gilbert sequencing reactions A + G (lane 13) and G (lane 14) allow determining the cleavage sites. The additives used in the experiments are indicated on top of the gel (details are given in the experimental part). Lanes 1-3: **1**. Lanes 4-6: **2**. Lanes 7-9: **3** and Lanes 10-12: **4**.

## References

1. K. van der Schilden, PhD thesis, Leiden University, 2006.
2. K. van der Schilden, F. Garcia, H. Kooijman, A. L. Spek, J. G. Haasnoot and J. Reedijk, *Angew. Chem.-Int. Edit.*, 2004, **43**, 5668-5670.
3. S. Ghumaan, B. Sarkar, M. P. Patil, J. Fiedler, R. B. Sunoj, W. Kaim and G. K. Lahiri, *Polyhedron*, 2007, **26**, 3409-3418.
4. G. Fasman, *Handbook of biochemistry and molecular biology: nucleic acids*, Boca Raton, p175, 1975.
5. H. Baruah and U. Bierbach, *Nucleic Acids Res.*, 2003, **31**, 4138-4146.

6. J. Sambrook, E. F. Fritsch and T. Maniatis, *Molecular Cloning: A Laboratory Manual*, Cold Spring Harbor Laboratory Press, Cold Spring Harbor, NY, 1989.
7. A. M. Maxam and W. Gilbert, *Proc. Natl. Acad. Sci. U. S. A.*, 1977, **74**, 560-564.
